# Supplementary material
Source: PubMed Central journal article supplement (PMC4121373)
Supplement: epi-9-634-s01.pdf [file epi-9-634-s01.pdf]

## **Supplemental Material to:**

**Gamze Kuser-Abali, Ahmet Alptekin, and Bekir Cinar**

**Overexpression of MYC and EZH2 cooperates to  
epigenetically silence MST1 expression**

**Epigenetics 2014; 9(4)**

**<http://dx.doi.org/10.4161/epi.27957>**

**<http://www.landesbioscience.com/journals/epigenetics/article/27957>**

## SUPPLEMENTAL DATA

### Overexpression of MYC and EZH2 Cooperates to Epigenetically Silence MST1 Expression

Gamze Kuser-Abali<sup>1</sup>, Ahmet Alptekin<sup>1</sup>, and Bekir Cinar<sup>1,2,\*</sup>

<sup>1</sup>Department of Medicine-Hematology and Oncology and Biomedical Sciences, Cancer Biology and Uro-Oncology Programs, Samuel Oschin Comprehensive Cancer Institute, Cedars-Sinai Medical Center, Los Angeles, CA 90048

<sup>2</sup>Department of Medicine, David Geffen School of Medicine, University of California Los Angeles, Los Angeles, CA 90095

| Primer Name | Primer Sequence (5'-3')                                                     | Application           |
|-------------|-----------------------------------------------------------------------------|-----------------------|
| MST1        | Fw: ACAATCCTCCTCCCACATTCCG<br>Rv: CACTCCTGACAAATGGGTGCTG                    | qRT-PCR               |
| EZH2        | Fw: TGCACATCCTGACTTCTGTGAGC<br>Rv: AGTCACTGGTCACCGAACACTC                   | qRT-PCR               |
| MYC         | Fw: TCCCTCCACTCGGAAGGAC<br>Rv: CTGGTGCATTTTCGGTTGTTG                        | qRT-PCR               |
| GAPDH       | Fw: CTGGGCTACACTGAGCACC<br>Rv: AAGTGGTCGTTGAGGGCAATG                        | qRT-PCR               |
| pMST1-Luc2  | Fw: AGAGGTACCTGCCATTTTCCTAATACTTACTGATG<br>Rv: AGAAAGCTTCTCACTGCTCCATCCTCCC | Cloning               |
| MST1-ChIP   | Fw: TTTGTGGGGTGGGTTTAGGAGGTTTGT<br>Rv: ACCAATAACCCCTCACCAACACAACAA          | ChIP-PCR              |
| miR-26a-RT  | ACCACACGTCATGTGACTGCCTATCCT                                                 | Reverse Transcription |
| miR-26a     | Fw: AGCGTTGTTTCAAGTAATCCAGG<br>Rv: ATCAACCACACGTCATGTGACT                   | qRT-PCR               |
| miR-26b-RT  | CTTAGCGTTGCGATCTTCTCAACCTATCCT                                              | Reverse Transcription |
| miR-26b     | Fw: GGCCGCTTCAAGTAATCCAGG<br>Rv: TGCTTAGCGTTGCGATCTTCTC                     | qRT-PCR               |
| U6-RT       | GTCGTATCCAGTGCAGGGTCCGAGGTATTTCGCACTGGATACGACAAAA<br>ATATG                  | Reverse Transcription |
| U6          | Fw: GCGCGTGAAGCGTTC<br>Rv: GTGCAGGGTCCGAGGT                                 | qRT-PCR               |

**Table S1.** Primers used in this study were listed.

| Target                                          | Cat. No. | Company                                   | Dilution- Application      |
|-------------------------------------------------|----------|-------------------------------------------|----------------------------|
| MST1                                            | 3682     | Cell Signaling (Danvers, MA)              | 1:1000 (WB)<br>1:50 (IHC)  |
| EZH2                                            | 612666   | BD Biosciences (San Jose, CA)             | 1:5000 (WB)<br>1:100 (IHC) |
| MYC                                             | sc-40    | Santa Cruz Biotechnology (Santa Cruz, CA) | 1:1000 (WB)                |
| H3K27me3                                        | 07-449   | Millipore (Billerica, MA)                 | 1:1000 (WB)                |
| Histone H3                                      | 06-755   | Millipore (Billerica, MA)                 | 1:1000 (WB)                |
| $\beta$ -Actin                                  | A2228    | Sigma (St Louis, MO)                      | 1:5000 (WB)                |
| Anti-mouse IgG-HRP                              | 7076     | Cell Signaling (Danvers, MA)              | 1:2000 (WB)                |
| Anti-rabbit IgG-HRP                             | 7074     | Cell Signaling (Danvers, MA)              | 1:2000 (WB)                |
| Alexa Fluor 488 conjugated goat anti-rabbit IgG | A-11008  | Life Technologies (Grand Island, NY)      | 1:1000 (IHC)               |
| Alexa Fluor 568 conjugated goat anti-mouse IgG  | A-21124  | Life Technologies (Grand Island, NY)      | 1:1000 (IHC)               |

WB: Western Blot; IHC: Immunohistochemistry

**Table S2.** Antibodies used in this study were listed.

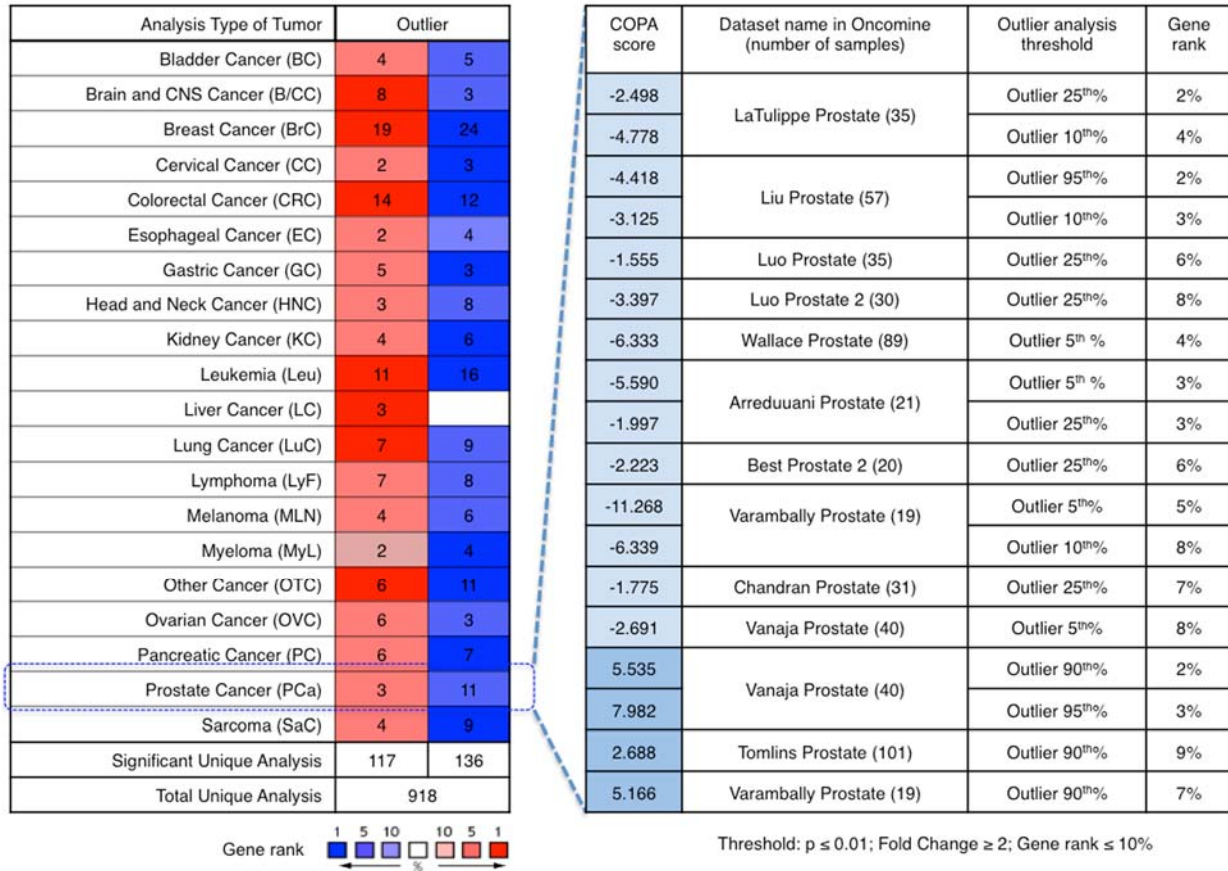

**Figure S1.** Cancer Outlier Profile Analysis (COPA) of publicly available microarray data sets in *Oncomine* for MST1 expression in 20 different tumor types including prostate cancer.

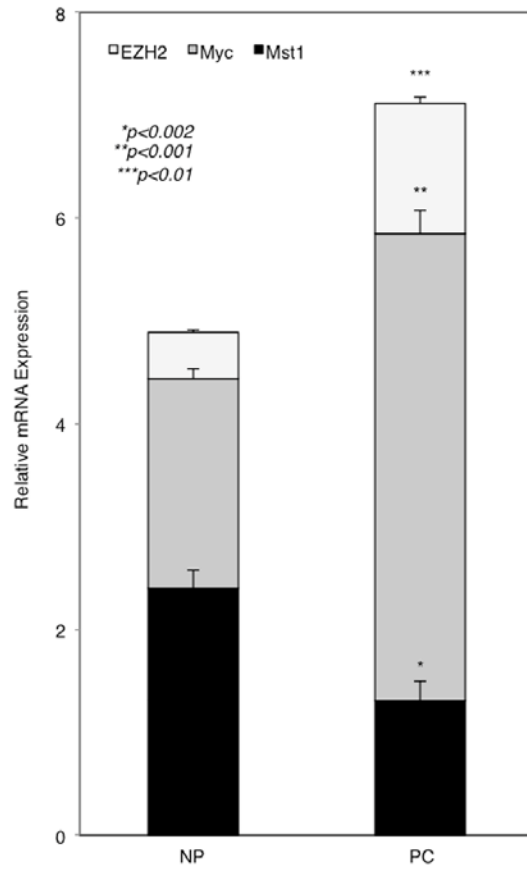

**Figure S2.** RT-qPCR analysis of MST1, MYC and EZH2 mRNA expression in frozen normal and cancerous prostate tissue samples. GAPDH mRNA was used as an internal control in PCR reactions. NP: Normal prostate (n=4), PC: Prostate cancer (n=8).

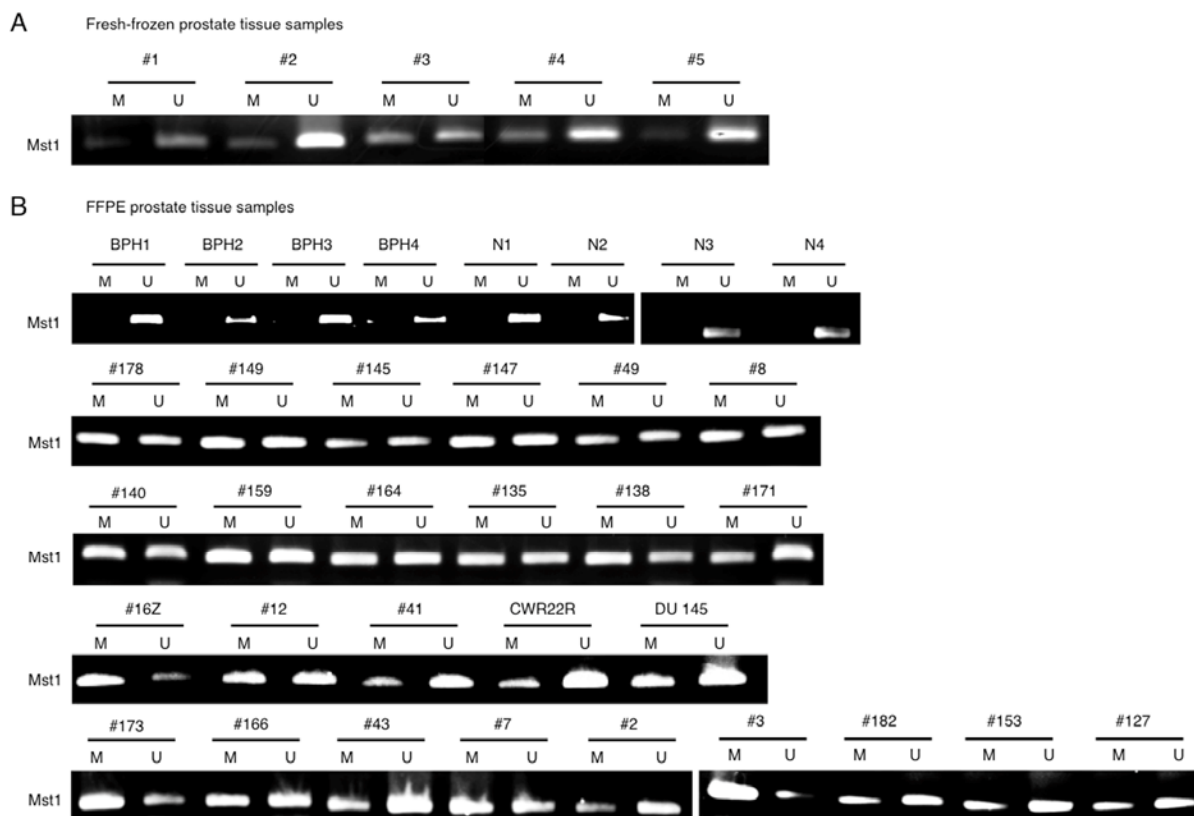

**Figure S3. A)** Methylation sensitive PCR (MSP) analysis of bisulfite-treated genomic DNA from fresh-frozen cancerous prostate tissue samples for MST1 promoter methylation. **B)** MSP analysis of bisulfite-treated genomic DNA from formalin-fixed and paraffin-embedded (FFPE) cancerous and non-cancerous prostate tissue samples. The procedures for MSP analysis were described in Materials and Methods. BPH: Benign prostate hyperplasia, N: normal (noncancerous) prostate, #: Blindly renamed patient ID number, M: Methylation, U: Unmethylation.

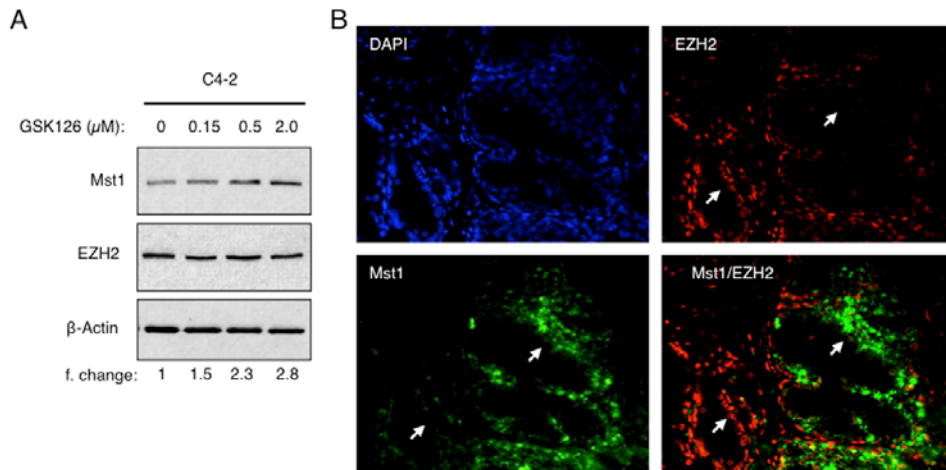

**Figure S4. A)** Analysis of MST1, EZH2, and  $\beta$ -Actin protein by western blot in C4-2 cells treated with increasing concentrations (0, 0.15, 0.5, and 2  $\mu$ M) of GSK126 for 72h in serum-fed conditions. MST1 protein levels were normalized to  $\beta$ -Actin (loading control) and the data presented as fold (f) change relative to DMSO control. **B)** Co-IF staining of EZH2 and MST1 protein levels in prostate tumor tissue sections. Alexa Fluor 488 stained MST1 (green), Alexa Fluor 568 stained EZH2 (red), and DAPI stained cell nuclei (blue). Magnification is 20x. Micrographs are representative of multiple images from two independent experiments.

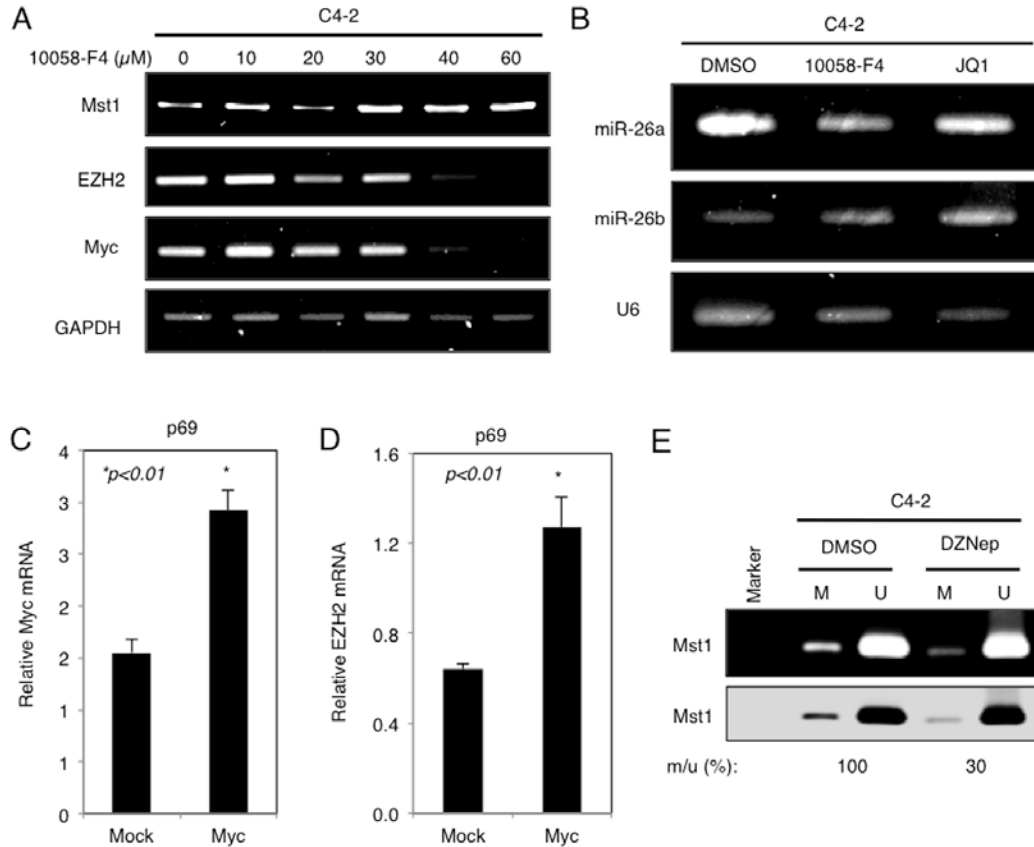

**Figure S5.** **A)** Analysis of Mst1, EZH2 and MYC mRNA levels by semi-quantitative RT-PCR in C4-2 cells that were treated with increasing concentrations (0, 10, 20, 30, 40, or 60  $\mu$ M) of 10058-F4 for 3 days in serum-fed conditions. GAPDH mRNA expression was used as an internal control. **B)** Semi-quantitative RT-PCR analysis of miR-26a and miR-26b expression levels in C4-2 cells treated either with DMSO, 60  $\mu$ M 10058-F4 or 500 nM JQ1 for 48h. U6 expression was used as an internal control. **C-D)** QPCR analysis of MYC and EZH2 mRNA levels in p69 cells transiently transfected with mock (vector) or MYC expression construct. **E)** MSP analysis of MST1 promoter in C4-2 cells after treatment with DMSO (vehicle) or 5  $\mu$ M DZNep for 72h. The number below the image represents the percent ratio of methylated (m) to unmethylated (u) DNA intensity quantified by *ImageJ* software. Data are ( $\pm$ S.E.) from multiple experiments
